# Supplementary material
Source: PubMed Central journal article supplement (PMC7855380)
Supplement: NIHMS1614546-supplement-Supplementary_Section_1.pdf [file NIHMS1614546-supplement-Supplementary_Section_1.pdf]

**Instructions: For each day please answer the “yes/no” questions. On headache days, please also answer whether you think this headache was a migraine.**

A migraine is defined as pain in the head that includes at least 2 or more of the following features (1. throbbing; 2. pain in front, side, top, or back of head; 3. moderate or severe pain; 4. worsens with activity) **AND** 1 or more of the following 2 associated symptoms (1. nausea and/or vomiting; 2. light/sound sensitivity).

| Form 5<br>The Migraine Discovery Pilot Study |     |           | Headache Diary<br>January 2017 |           |     | Subject ID: _____<br>Visit Name: _____ |     |           |     |           |     |           |     |
|----------------------------------------------|-----|-----------|--------------------------------|-----------|-----|----------------------------------------|-----|-----------|-----|-----------|-----|-----------|-----|
| SUNDAY                                       |     | MONDAY    |                                | TUESDAY   |     | WEDNESDAY                              |     | THURSDAY  |     | FRIDAY    |     | SATURDAY  |     |
| 1                                            |     | 2         |                                | 3         |     | 4                                      |     | 5         |     | 6         |     | 7         |     |
| Headache*                                    | Y N | Headache* | Y N                            | Headache* | Y N | Headache*                              | Y N | Headache* | Y N | Headache* | Y N | Headache* | Y N |
| Migraine*                                    | Y N | Migraine* | Y N                            | Migraine* | Y N | Migraine*                              | Y N | Migraine* | Y N | Migraine* | Y N | Migraine* | Y N |
| 8                                            |     | 9         |                                | 10        |     | 11                                     |     | 12        |     | 13        |     | 14        |     |
| Headache*                                    | Y N | Headache* | Y N                            | Headache* | Y N | Headache*                              | Y N | Headache* | Y N | Headache* | Y N | Headache* | Y N |
| Migraine*                                    | Y N | Migraine* | Y N                            | Migraine* | Y N | Migraine*                              | Y N | Migraine* | Y N | Migraine* | Y N | Migraine* | Y N |
| 15                                           |     | 16        |                                | 17        |     | 18                                     |     | 19        |     | 20        |     | 21        |     |
| Headache*                                    | Y N | Headache* | Y N                            | Headache* | Y N | Headache*                              | Y N | Headache* | Y N | Headache* | Y N | Headache* | Y N |
| Migraine*                                    | Y N | Migraine* | Y N                            | Migraine* | Y N | Migraine*                              | Y N | Migraine* | Y N | Migraine* | Y N | Migraine* | Y N |
| 22                                           |     | 23        |                                | 24        |     | 25                                     |     | 26        |     | 27        |     | 28        |     |
| Headache*                                    | Y N | Headache* | Y N                            | Headache* | Y N | Headache*                              | Y N | Headache* | Y N | Headache* | Y N | Headache* | Y N |
| Migraine*                                    | Y N | Migraine* | Y N                            | Migraine* | Y N | Migraine*                              | Y N | Migraine* | Y N | Migraine* | Y N | Migraine* | Y N |
| 29                                           |     | 30        |                                | 31        |     |                                        |     |           |     |           |     |           |     |
| Headache*                                    | Y N | Headache* | Y N                            | Headache* | Y N |                                        |     |           |     |           |     |           |     |
| Migraine*                                    | Y N | Migraine* | Y N                            | Migraine* | Y N |                                        |     |           |     |           |     |           |     |

**\*If you answered “YES” this is a headache day, please complete a headache record (Form 6) for the worst (most severe) headache that you had that day.**

**Study Coordinators:** When reviewing the calendars with subjects, be sure to verify the presence of a headache/migraine **EACH DAY** & check that Form 6 has been completed for **EACH** headache day.

Initial & date here when review complete: \_\_\_\_\_

## The Migraine Discovery Pilot Study

Initials of Completer: \_\_\_\_\_

Subject ID: \_\_\_\_\_

Visit Name : \_\_\_\_\_

1. Date of current headache (please check your headache calendar)  
\_\_\_ / \_\_\_ / \_\_\_\_\_ (mm/dd/yyyy)
2. What time did your headache start?  
\_\_:\_\_ (record time) AM/PM (circle one)  I woke up with this headache
3. What time did your headache end?  
\_\_:\_\_ (record time) AM/PM (circle one)  I went to bed with this headache
4. What pain medication(s) did you take for this headache? (select all that apply)  
 Acetaminophen (Tylenol)  Ibuprofen (Advil, Motrin)  Naproxen (Aleve)  
 Aspirin  Excedrin  Amerge (Naratriptan)  
 Axert (Almotriptan)  Frova (Frovatriptan)  Imitrex (Sumatriptan)  
 Maxalt (Rizatriptan)  Relpax (Eletriptan)  Zomig (Zolmitriptan)  
 Other \_\_\_\_\_
5. Which word describes the severity of your headache? (select only one)  
 Mild  Moderate  Severe
6. Rate your average pain for this headache on a scale of 0 - 10 ("0" = no pain & "10" = the worst pain). \_\_\_\_\_
7. Which of the following describes the pain you feel? (select all that apply)  
 Throbbing  Pressing / Squeezing  Stabbing  
 Constant  Sharp  Other (list): \_\_\_\_\_
8. What is the location of your headache pain? (select only one)  
 One side of your head  Both sides of your head
9. Which part(s) of your head hurts? (select all that apply)  
 Both Temples / Sides  Left Temple / Side  Right Temple / Side  
 Around Eyes  Behind Eyes  Top  
 Front  Back  All Over  
 Other (list): \_\_\_\_\_
10. Did you have any auras (warnings) that today's headache was going to start?  
 Yes  No  
 a. If yes, which type of auras did you have today? (select all that apply)  
 Visual  Sensory  Trouble Talking  
 Weakness  Smell  Taste  
 Auditory  Other (list): \_\_\_\_\_
11. Do you have any of these symptoms? (select all that apply)  
 Nausea  Sensitivity to Smells  No Symptoms  
 Vomiting  Lightheadedness  Other (list): \_\_\_\_\_  
 Sensitivity to Light  Difficulty Thinking  
 Sensitivity to Sound
12. Did today's headache change your activity level?  
 Yes  No
13. Does activity or play make today's headache worse?  
 Yes  No
14. Was today a school day?  Yes  No  
 a. If yes, select one:  
 I missed a full day of school.  
 I missed a half or part of the day of school.  
 I attended a full day of school, my headache affected my performance.  
 I attended a full day of school, my headache did not affect my performance.
15. Could you do things at home (chores, homework, etc)?  Yes  No  
 a. If yes, select one:  
 My headache affected my performance.  
 My headache did not affect my performance.
16. Did you participate in other activities (play sports, go out, play)?  Yes  No  
 a. If yes, select one:  
 My headache affected my performance.  
 My headache did not affect my performance.

This study used the standards set by the National Institute of Neurological Disorders and Stroke Common Data Elements (CDE) Project for the Headache Diary and Headache Record to collect participant's demographic, headache diary and headache record data. Additional information on these Common Data Elements is available at <https://www.commondataelements.ninds.nih.gov/ProjReview>
