# Supplementary material
Source: PubMed Central journal article supplement (PMC7855380)

**A****Trapezius**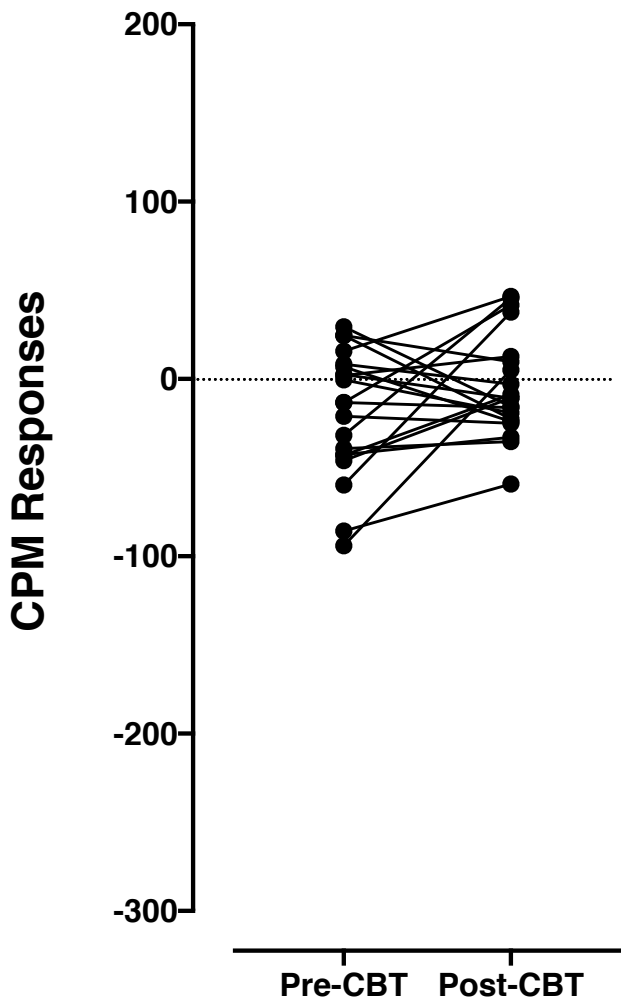**B****Leg**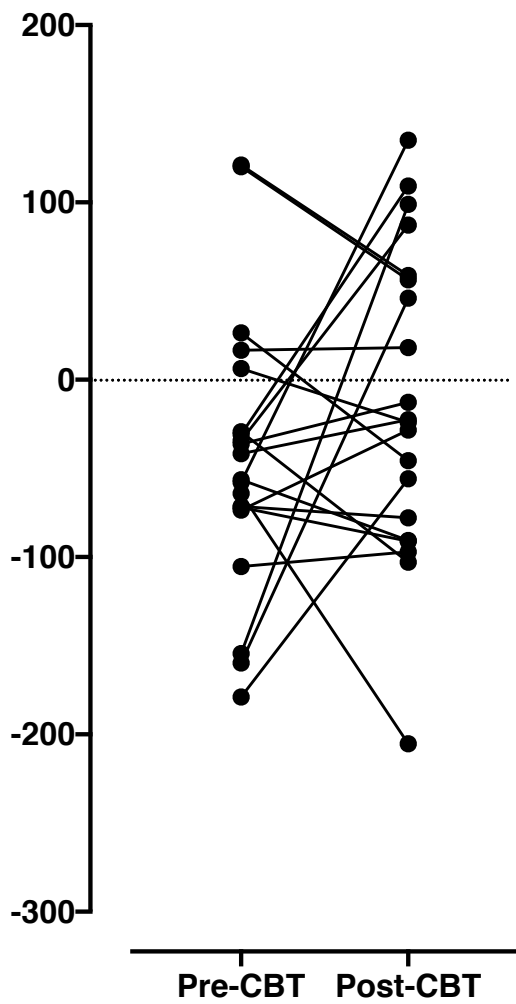**C**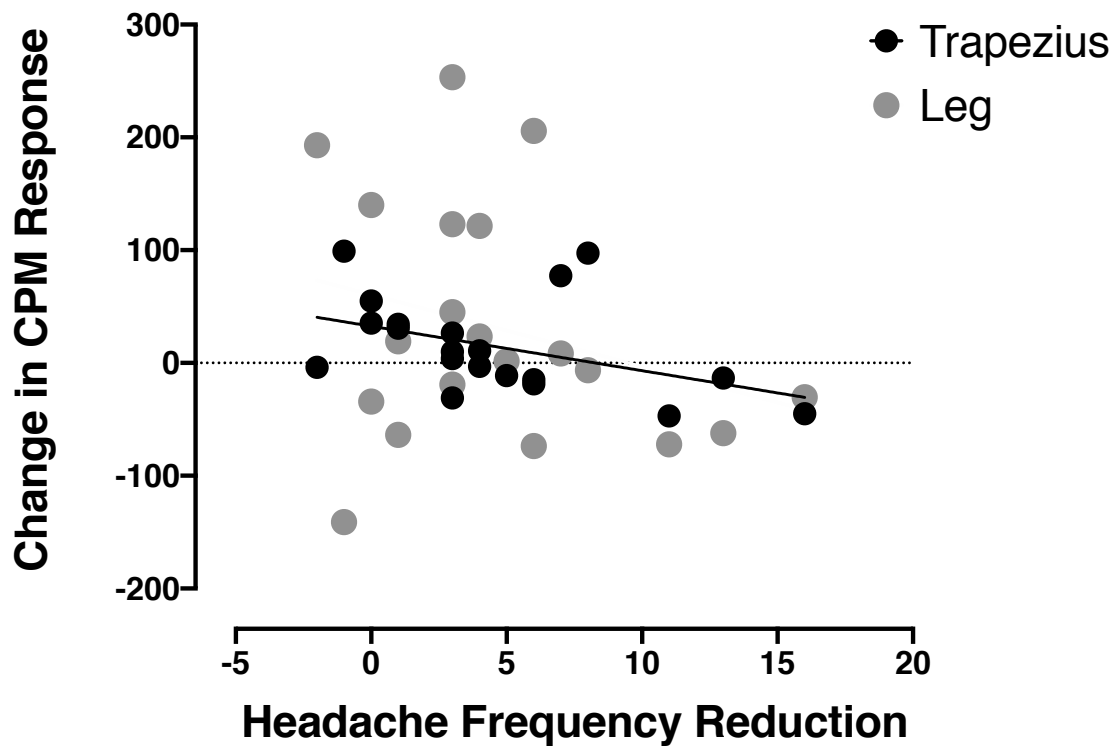

Supplement: NIHMS1614546-supplement-Supplementary_Section_3.pdf [file NIHMS1614546-supplement-Supplementary_Section_3.pdf]
